# Supplementary material for: Identification of hepatic protein-protein interaction targets for betaine homocysteine S-methyltransferase
Source: PubMed Central journal article supplement (PMC6010280; doi:10.1371/journal.pone.0199472), 2018-06-20

## S1 Appendix. Original immunoblots used in the figures

Fig 4. Original images of immunoprecipitations carried out for MAT $\alpha$ 1 incubated with anti-HA (left) or anti-FLAG (right)

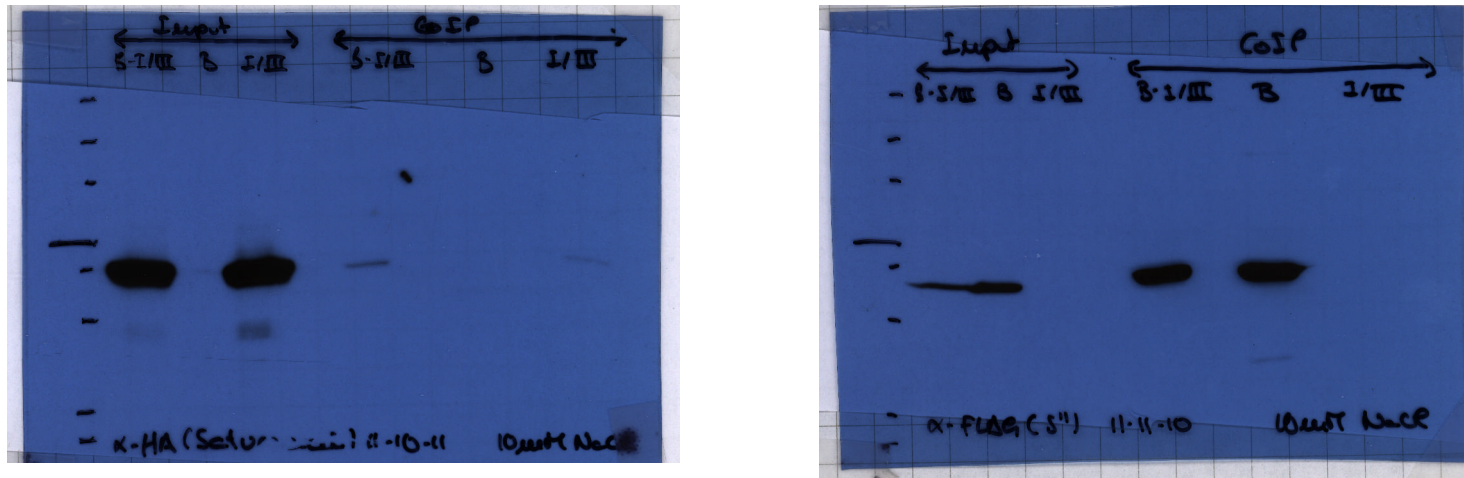

Fig 5. Original images of immunoprecipitations carried out for MAT $\alpha$ 2 incubated with anti-HA (left) or anti-FLAG (right)

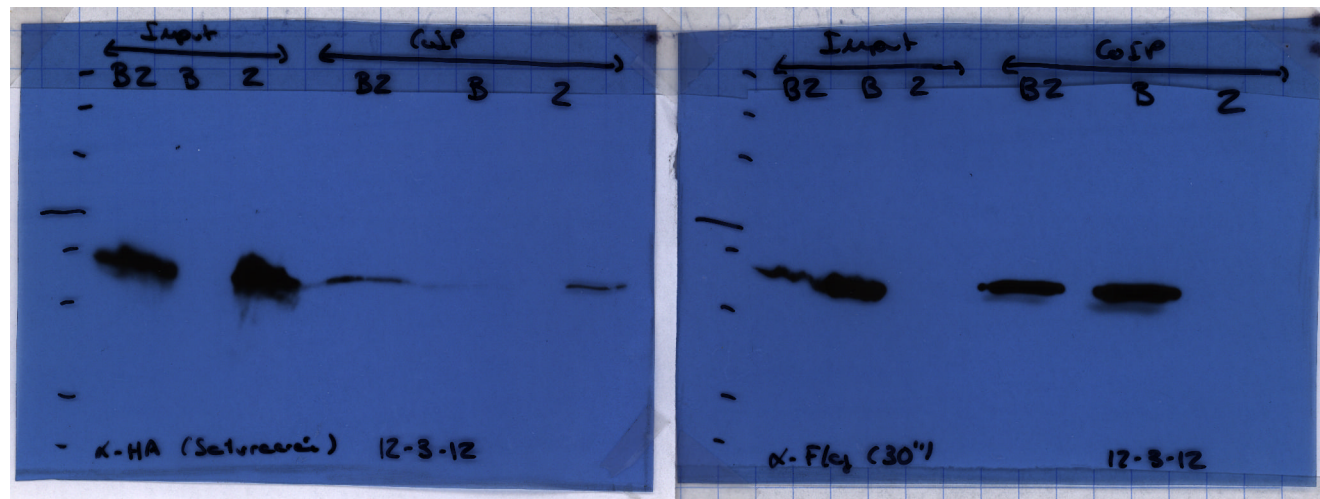

Fig 6. Original images of immunoprecipitations carried out for actin B incubated with anti-FLAG (left) or anti-HA (right)

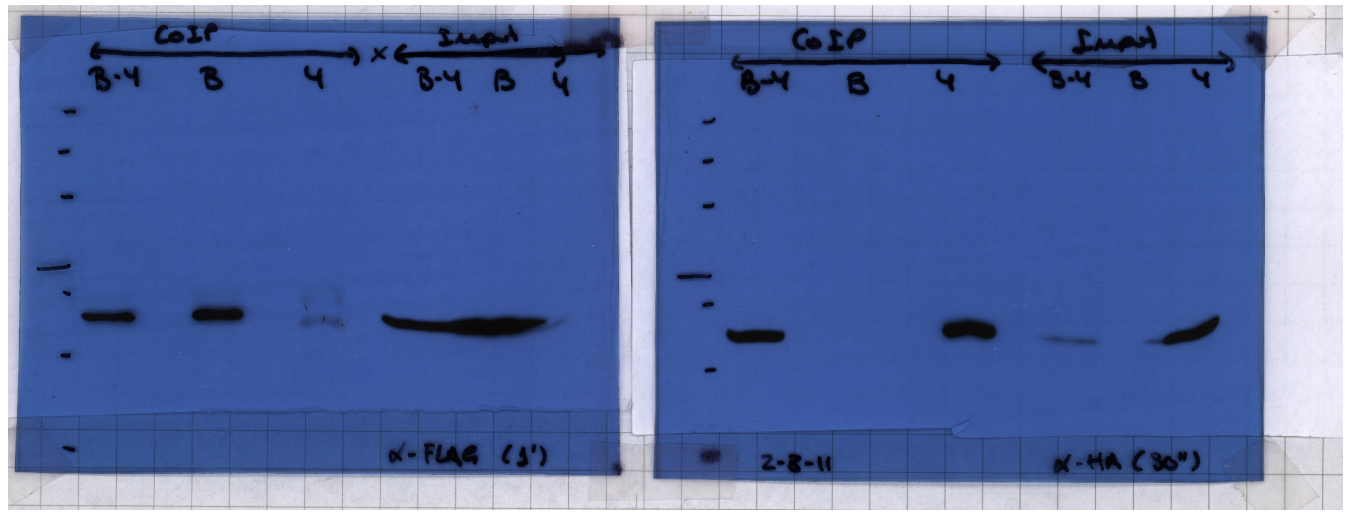

Fig 7. Original images of immunoprecipitations carried out for Ybx1 incubated with anti-HA (left) or anti-FLAG (right)

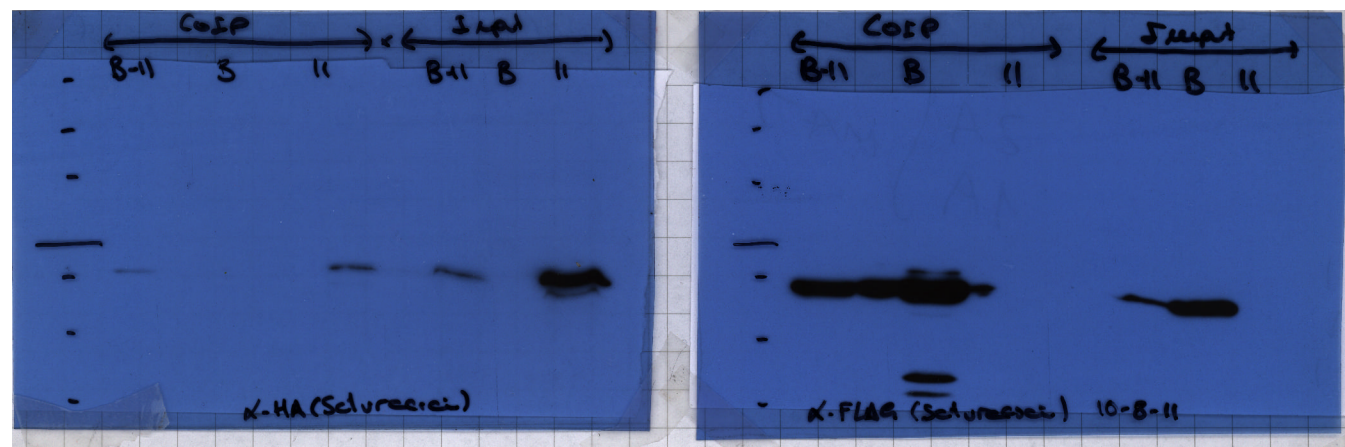

Fig 8. Original images of immunoprecipitations carried out for Hmgb1 incubated with anti-HA (left) or anti-FLAG (right)

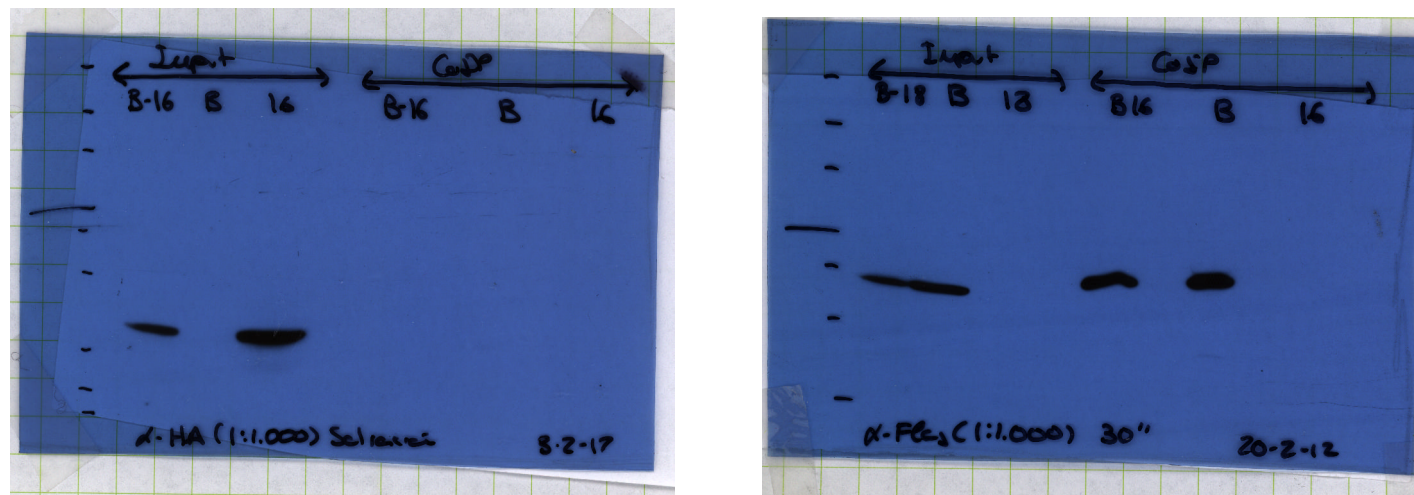

Fig 9. Original images of immunoprecipitations carried out for Prkaca incubated with anti-HA (left) or anti-FLAG (right)

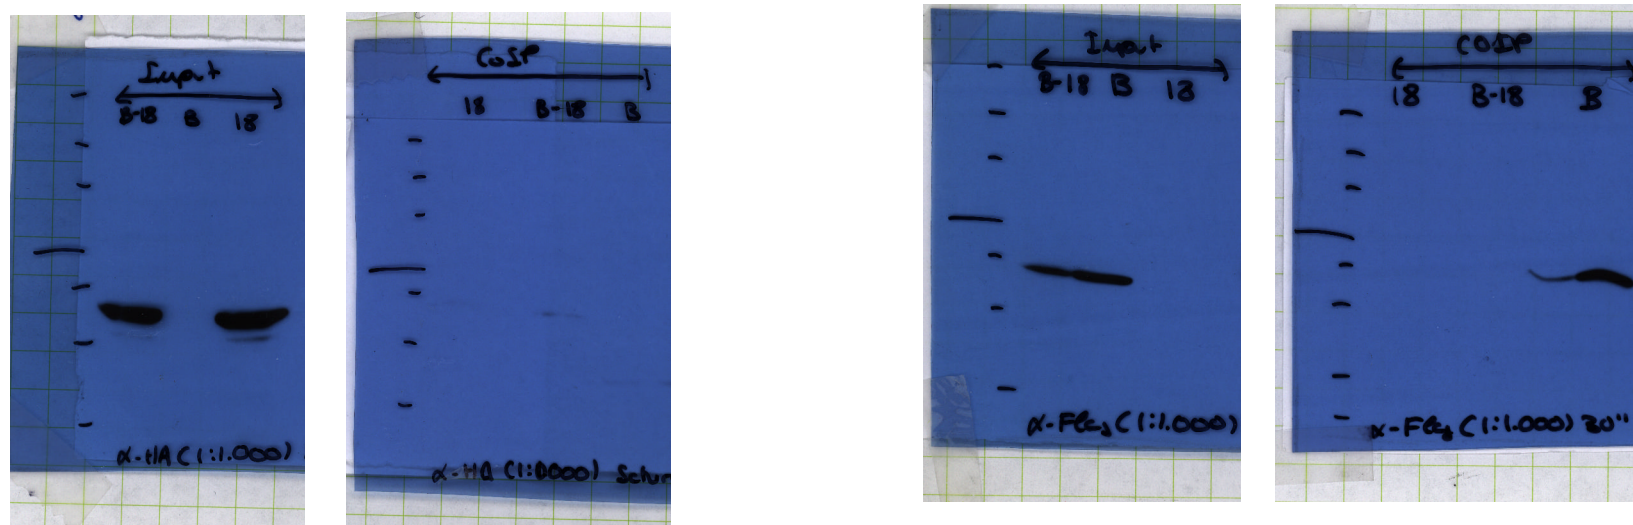

Fig 10. Original images of immunoprecipitations carried out for ALDOB (top) and HPD (down) incubated with a mixture of anti-HA and anti-BHMT

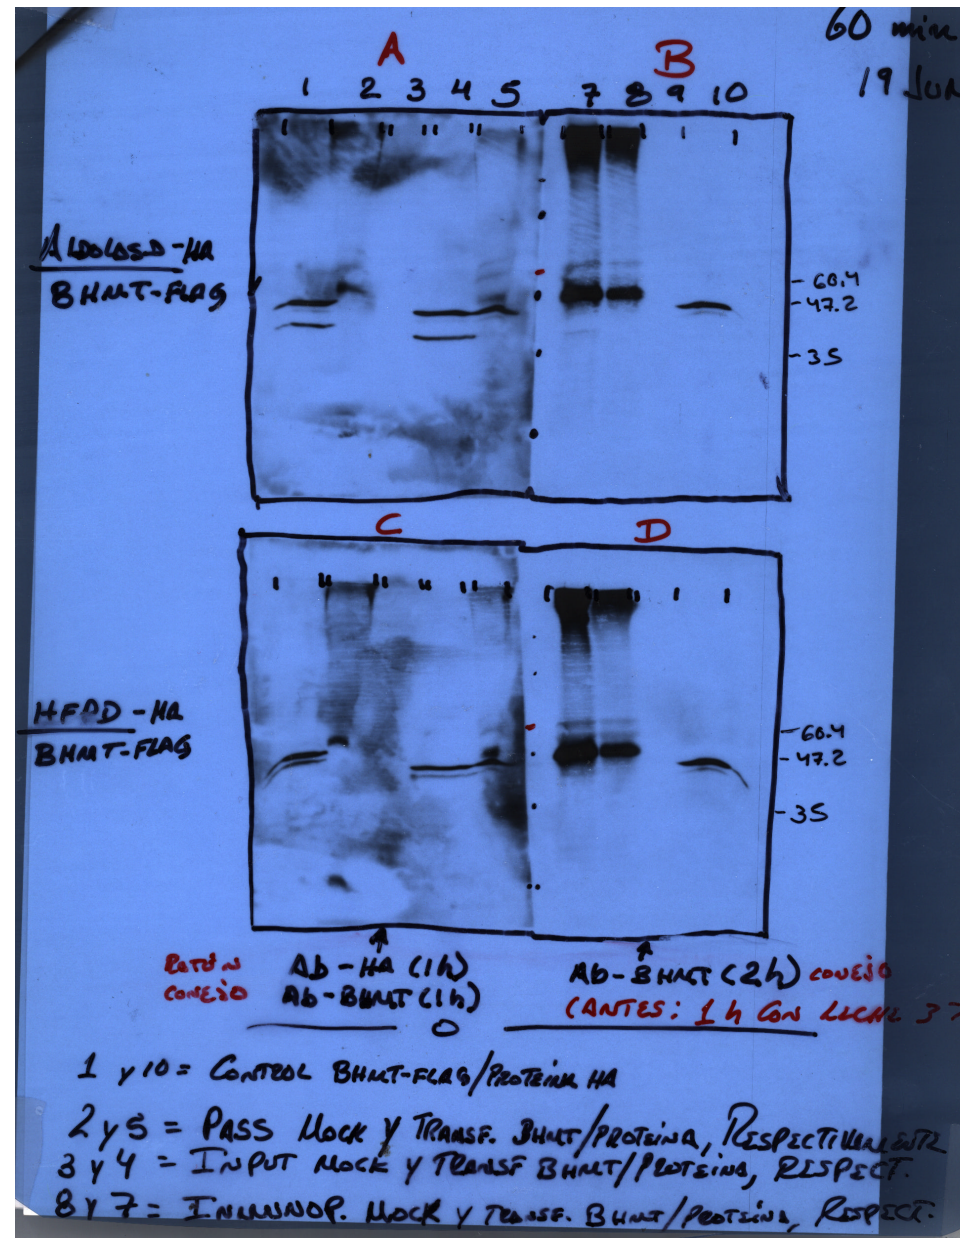

Supplement: pone.0199472.s002.pdf [file pone.0199472.s002.pdf]
